# Supplementary material for: Geht Tourismus alle an? Teilnahme der deutschen Gemeinden am Übernachtungstourismus
Source: publisher site journal article supplement (doi:10.1515/tw-2022-0011), 2022-10-14
Supplement: Supplementary file 1 [file Geht_Tourismus_Alle_An_Anhang.zip]

**Tourismus geht alle an: Übernachtungstouristische Klassifizierung der Gemeinden in Deutschland**

# Anhang

# zu 3.1.2 Imputation der Daten der Beherbergungsstatistik

Die Statistischen Ämter des Bundes und der Länder halten eine Regionaldatenbank Deutschland vor, in der unter anderem die Gemeindeergebnisse der Beherbergungsstatistik („Monatserhebung im Tourismus“) zu finden sind.[[1]](#footnote-1)

Ausgewertet wurde die Tabelle: regionalstatistik.de, Tabelle 45412-01-03-5, „Beherbergungsbetriebe, Schlafgelegenheiten, Gästeankünfte, Gästeübernachtungen - Jahressumme - regionale Tiefe: Gemeinden (ab 2018)“

Das Gesamtvolumen der Übernachtungen von In- und Ausländern in Beherbergungsbetrieben wird vom Statistischen Bundesamt für das Jahr 2018 mit 478.040.600 angegeben, die Zahl der Betriebe im Juli 2018 mit 51.751 und im Dezember 2018 mit 52.170 (Statistisches Bundesamt 2019a). Basierend auf der Betriebszahl vom Juli ergeben sich durchschnittlich 9.237 Übernachtungen je Betrieb.

Diese Tabelle der Regionalstatistik, gematcht mit dem Gemeindeverzeichnis, kommt auf 441.527.348 Übernachtungen, damit entsteht eine Differenz von 36.513.252 Übernachtungen. Diese Differenz muss auf die Betriebe der Gemeinden verteilt werden, für die aus Geheimhaltungsgründen keine Übernachtungszahl angegeben ist. Das sind 3.333 Gemeinden mit 5.673 Betrieben. Werden die rund 36,5 Mio. Übernachtungen auf 5.673 Betriebe zu gleichen Teilen aufgeteilt, ergeben sich 6.436 rechnerische Übernachtungen je Betrieb.

Weiterreichende und vermutlich genauere Imputationsverfahren wie die Modellierung von Nachfragewerten anhand von Gemeindeeigenschaften sind vorstellbar und erste Grundlagen dazu wurden etwa im Projekt „Kapazitätsmonitor Schleswig-Holstein gelegt (Homp und Schmücker 2015). Die Entwicklung solcher Modelle muss weiteren Forschungen vorbehalten bleiben.

# zu 4.1.1: Einwohnerkonzentration der Gemeinden

Tabelle 3: Ausgewählte Parameter für Einwohnerzahl und Fläche der Gemeinden in Deutschland

|  | Einwohnerzahl | Fläche (qkm) |
| --- | --- | --- |
| Mittelwert | 7.483 | 32,3 |
| Standardabweichung | 49.425 | 40,8 |
| Minimum | 0 | 0,3 |
| P25 | 617 | 8,3 |
| P50 | 1.715 | 18,8 |
| P75 | 5.341 | 40,3 |
| P95 | 23.632 | 105,9 |
| Maximum | 3.645.000 | 891,1 |
| Gini Koeffizient | 0,78 | 0,54 |

Basis: 11.095 Gemeinden. Quelle: Stat. Bundesamt, eigene Berechnungen. Gebietsstand: 31.12.2018

# zu 4.2.1 Teilnahme nach der Beherbergungsstatistik

Basis sind die 11.095 Gemeinden des Gemeindeverzeichnisses 2018, und zwar ohne das gemeinsame deutsch-luxemburgische Hoheitsgebiet und das Küstengewässer in Mecklenburg-Vorpommern.

Tabelle 4: Gemeinden in Deutschland 2018 nach Klassen der Beherbergungsstatistik (absolute Werte)

|  | Anzahl  Gemeinden | Einwohner (Summe) | Fläche (Summe) | Übernach- tungen (Summe) |
| --- | --- | --- | --- | --- |
| Gemeinden insgesamt | 11.095 | 83.019.213 | 358.319 | 478.038.779 |
| Gemeinden ohne Übernachtungen | 4.369 | 5.132.123 | 68.162 | 0 |
| Gemeinden mit Übernachtungen | 6.726 | 77.887.090 | 290.157 | 478.038.779 |
| Gemeinden mit 1 oder 2 Betrieb(en) (imputierte Werte) | 2.983 | 8.656.707 | 70.783 | 26.148.097 |
| Gemeinden mit 3 und mehr Betrieben | 3.743 | 69.230.383 | 219.374 | 451.890.679 |

Quelle: Stat. Bundesamt, eigene Berechnungen. Berichtsjahr 2018

Tabelle 5: Gemeinden in Deutschland 2018 nach Klassen der Beherbergungsstatistik (relative Werte)

|  | Anzahl  Gemeinden | Einwohner (Summe) | Fläche (Summe) | Übernach- tungen (Summe) |
| --- | --- | --- | --- | --- |
| Gemeinden insgesamt | 100,0% | 100,0% | 100,0% | 100,0% |
| Gemeinden ohne Übernachtungen | 39,4% | 6,2% | 19,0% | 0,0% |
| Gemeinden mit Übernachtungen | 60,6% | 93,8% | 81,0% | 100,0% |
| Gemeinden mit 1 oder 2 Betrieb(en) (imputierte Werte) | 26,5% | 10,4% | 19,8% | 5,5% |
| Gemeinden mit 3 und mehr Betrieben | 33,7% | 83,4% | 61,2% | 94,5% |

Quelle: Stat. Bundesamt, eigene Berechnungen. Berichtsjahr 2018

Tabelle 3: Gemeinden in Deutschland 2018 nach Klassen der Beherbergungsstatistik (Dichtewerte)

|  | Anzahl  Gemeinden | Übernach- tungen (Summe) | Übernach- tungen je  Einwohner Mittelwert | Übernach- tungen je km² Mittelwert |
| --- | --- | --- | --- | --- |
| Gemeinden insgesamt | 11.095 | 478.038.779 | 5,76 | 1.334 |
| Gemeinden ohne Übernachtungen | 4.369 | 0 | 0,00 | 0 |
| Gemeinden mit Übernachtungen | 6.726 | 478.038.779 | 6,14 | 1.648 |
| Gemeinden mit 1 oder 2 Betrieb(en) (imputierte Werte) | 2.938 | 26.148.097 | 3,02 | 369 |
| Gemeinden mit 3 und mehr Betrieben | 3.743 | 451.890.679 | 6,53 | 2.060 |

Quelle: Stat. Bundesamt, eigene Berechnungen. Berichtsjahr 2018

# zu 4.2.2 Teilnahme bei der Privatvermietung

Basis sind die 11.095 Gemeinden des Gemeindeverzeichnisses 2018, und zwar ohne das gemeinsame deutsch-luxemburgische Hoheitsgebiet und das Küstengewässer in Mecklenburg-Vorpommern.

Tabelle 4: Gemeinden in Deutschland 2018 nach Klassen der Privatvermietung (absolute Werte)

|  | Anzahl  Gemeinden | Einwohner (Summe) | Fläche (Summe) | Listings (Summe) | Reservation Days (Summe) |
| --- | --- | --- | --- | --- | --- |
| Gemeinden insgesamt | 11.095 | 83.019.213 | 358.319 | 413.712 | 23.553.405 |
| Gemeinden ohne Listings | 2.954 | 3.092.841 | 43.522 | 0 | 0 |
| Gemeinden mit Listings | 8.141 | 79.926.372 | 314.797 | 413.712 | 23.553.405 |
| Gemeinden mit Listings |  |  |  |  |  |
| nur auf Airbnb | 5.893 | 37.597.389 | 209.680 | 62.634 | 4.017.492 |
| nur auf Fewo-direkt | 560 | 760.790 | 10.991 | 1.076 | 71.300 |
| auf beiden Plattformen | 1.688 | 41.568.193 | 94.127 | 350.002 | 19.464.613 |

Quelle: Airdna, eigene Berechnungen. Berichtsjahr 2018

Tabelle 5: Gemeinden in Deutschland 2018 nach Klassen der Privatvermietung (relative Werte)

|  | Anzahl  Gemeinden | Einwohner (Summe) | Fläche (Summe) | Listings (Summe) | Reservation Days (Summe) |
| --- | --- | --- | --- | --- | --- |
| Gemeinden insgesamt | 100,0 % | 100,0 % | 100,0 % | 100,0 % | 100,0 % |
| Gemeinden ohne Listings | 26,6 % | 3,7 % | 12,1 % | 0,0 % | 0,0 % |
| Gemeinden mit Listings | 73,4 % | 96,3 % | 87,9 % | 100,0 % | 100,0 % |
| Gemeinden mit Listings |  |  |  |  |  |
| nur auf Airbnb | 53,1% | 45,3% | 58,5% | 15,1% | 17,1% |
| nur auf Fewo-direkt | 5,0% | 0,9% | 3,1% | 0,3% | 0,3% |
| auf beiden Plattformen | 15,2% | 50,1% | 26,3% | 84,6% | 82,6% |

Quelle: Airdna, eigene Berechnungen. Berichtsjahr 2018

# zu 4.1.3 Verschneidung der Datenquellen

Tabelle 6: Gemeinden in Deutschland 2018 nach Datenquellen (absolute Werte)

|  | Anzahl  Gemeinden | Einwohner (Summe) | Fläche (Summe) |
| --- | --- | --- | --- |
| Gemeinden insgesamt | 11.095 | 83.019.213 | 358.319 |
| Gemeinden ohne Übernachtungsangebot | 2.154 | 1.529.254 | 26.681 |
| Gemeinden mit Übernachtungsangebot |  |  |  |
| nur in der Beherbergungsstatistik | 800 | 1.563.587 | 16.840 |
| nur in der Privatvermietung | 2.215 | 3.602.869 | 41.480 |
| in beiden Angebotsformen | 5.926 | 76.323.503 | 273.316 |

Quelle: Eigene Berechnungen auf Basis von Daten des Stat. Bundesamtes und AirDNA. Berichtsjahr 2018

# Datengrundlagen

*Lizenzinformationen*

- Gemeindeverzeichnis-Informationssystem: © Daten (im Auftrag der Herausgebergemeinschaft Statistische Ämter des Bundes und der Länder): Statistisches Bundesamt (Destatis), 2020. Vervielfältigung und Verbreitung, auch auszugsweise, mit Quellenangabe gestattet.
- Verwaltungsgebiete VG250-EW: © GeoBasis-DE / BKG (2020); Open Data Datenlizenz Deutschland – Namensnennung – Version 2.0
- Daten der Beherbergungsstatistik: © Statistisches Bundesamt (Destatis), 2020. Vervielfältigung und Verbreitung, auch auszugsweise, mit Quellenangabe gestattet.

1. [↑](#footnote-ref-1)
